# Supplementary material
Source: Elsevier journal article supplement (https://www.sciencedirect.com/science/article/pii/S2667049622000187)
Supplement: mmc1 [file S2667049622000187:mmc1.pdf]

## **Nuevo caso de síndrome Dias-Logan: variante patogénica c.1076\_1100 *de novo* en el gen *BCL11A* no descrita previamente**

### **A new case of Dias-Logan syndrome: a previously unreported *de novo* pathogenic *BCL11A* variant (c.1076\_1100)**

M. José Sánchez Soler

Hospital Clínico Universitario Virgen de la Arrixaca. IMIB-Arrixaca, Murcia, España

Marta Pérez Laencina

Universidad de Murcia, Murcia, España

Ana Teresa Serrano-Antón

Sección Genética Médica, Servicio de Pediatría. IMIB-Arrixaca, Hospital Clínico Universitario Virgen de la Arrixaca, Murcia, España

Encarna Guillén-Navarro

Sección Genética Médica, Servicio de Pediatría. IMIB-Arrixaca, Hospital Clínico Universitario Virgen de la Arrixaca, Murcia, España

El síndrome de Dias-Logan o DI con persistencia de HbF (OMIM 617101) es secundario a variantes patogénicas en el gen *BCL11A* (1) y presenta un patrón de herencia autosómico dominante. Hasta el momento, solo 28 casos han sido descritos en la literatura (2,3,4), en su gran mayoría (28/29) *de novo*. Se caracteriza por retraso psicomotor y DI en grado variable, trastorno del lenguaje y de conducta, distintos tipos de epilepsia (crisis tónicas, mioclónicas, atónicas, ausencias y espasmos), hipotonía, microcefalia, hiperlaxitud articular, estrabismo y rasgos craneofaciales variables con elevación de los niveles de HbF. También se han descrito malformaciones inespecíficas del sistema nervioso central (hipoplasia de cuerpo calloso y vermis cerebeloso, defectos de sustancia blanca, etc.) y encefalopatía epiléptica en algunos pacientes (5).

El gen *BCL11A* codifica una proteína reguladora de dedos de zinc tipo C2H2 con funciones esenciales en múltiples tejidos durante el desarrollo humano, destacando su papel en el cambio de la expresión de  $\gamma$  a  $\beta$ -globina durante la transición de la eritropoyesis fetal a adulta. El mecanismo etiopatogénico de la enfermedad lo constituyen las variantes de pérdida de función en dicho gen y hasta la fecha se han descrito variantes de tipo *nonsense* y *frameshift*, deleciones intragénicas o completas del gen, así como algunas variantes *missense* (6).

Se describe el caso de un niño de 11 años remitido a los 9 años desde Neuropediatría a la consulta de Genética por DI leve, microcefalia y rasgos particulares. Es el tercer hijo de padres sanos no consanguíneos procedentes de Colombia. No tiene antecedentes familiares de interés, salvo un hermano de 19 años con dificultades escolares y diagnóstico de trastorno de déficit de atención e hiperactividad (TDAH). La gestación fue espontánea y cursó sin incidencias. Descartan la exposición a alcohol u otros tóxicos. El parto fue vaginal a término, pesó 3.270g, no precisó reanimación y el periodo neonatal fue normal. El cribado metabólico y las otoemisiones acústicas resultaron normales. Evolutivamente no ha presentado problemas de alimentación, aunque el desarrollo pondoestatural siempre ha sido deficiente, estando la talla,

peso y perímetro cefálico en percentiles bajos. Presentó un retraso global del desarrollo, deambuló a los 20 meses y sus primeras palabras con sentido referencial las dijo en torno a los 2 años. Está escolarizado en un colegio ordinario con apoyos y ha precisado repetir un curso. Actualmente está en seguimiento por Salud Mental y Neuropediatría por DI leve/límite (CI 79), trastorno del lenguaje y TDAH. Presentó una crisis generalizada tónico-clónica a los 8 años tras iniciar tratamiento con metilfenidato, permaneciendo posteriormente sin crisis. La familia refiere un sueño irregular con múltiples despertares que mejoró con la toma melatonina. En la Tabla I podemos ver resumida la clínica de nuestro caso en comparación con la descrita en la literatura.

A la exploración física con 11 años destaca: peso 25.2 kg (p10), talla 130 cm (p5), perímetro cefálico es de 50 cm (p<1, -2.75 DE). Rasgos craneofaciales particulares que podemos apreciar en la Figura I.

Durante su seguimiento en Neuropediatría se realizaron las siguientes pruebas complementarias: RM cerebral y EEG normales; CGH-Array y estudio molecular de síndrome X-frágil: normales; estudio metabólico en sangre y orina: perfil de sialotransferrina, perfil de aminoácidos, ácidos orgánicos, creatina/creatinina, saicar, sulfitest, acilcarnitinas, lactato/piruvato, glucosaminoclicanos, normal. Tras su valoración en Genética se solicitó exoma clínico, identificándose 4 variantes de significado incierto en los genes *CHD8*, *KMT2C* y *ANKRD11*, asociados a síndromes con fenotipo parcialmente solapante: susceptibilidad a autismo y DI con macrocefalia, Kleefstra tipo 2 y KBG respectivamente; y una variante probablemente patogénica en el gen *BCL11A* asociado a S. Dias-Logan. Se solicitó estudio en muestra de progenitores de las variantes en los genes *ANKRD11* y *BCL11A* por ser la clínica de nuestro paciente muy similar a la presente en estos trastornos. El estudio fue concluyente al identificar que la variante heterocigota tipo *frameshit* c.1076\_1100del en el gen *BCL11A* se había producido *de novo* y confirmar la persistencia de la HbF en estudio de electroforesis de Hb: HbA 67%, HbA2 1.5%, HbF 30.9%. Se solicitó posteriormente estudio de la variante en muestra del hermano por la posibilidad de un mosaicismo germinal en los padres, que resultó negativo.

Este caso muestra la gran utilidad del exoma clínico para la identificación de casos con trastorno del neurodesarrollo inespecífico y de muy baja prevalencia.

Se describe una nueva variante en el gen *BCL11A*, lo que amplía el genotipo.

Las manifestaciones clínicas son similares a las descritas en la literatura, siendo el retraso global del desarrollo con afectación significativa del lenguaje, la DI, así como la persistencia de HbF, las características presentes en todos los casos publicados.

Aunque los pacientes con S. Dias-Logan no tienen un fenotipo facial distintivo, en casos de DI, microcefalia y epilepsia, la electroforesis de Hb debe plantearse, ya que puede agilizar el proceso diagnóstico, con las consecuencias que ello tiene tanto para el paciente como para su familia.

## Bibliografía

1. Dias C, Estruch SB, Graham SA, McRae J, Sawiak SJ, Hurst JA et al. Logan DW. *BCL11A* Haploinsufficiency Causes an Intellectual Disability Syndrome and Dysregulates Transcription. *Am J Hum Genet.* 2016 Aug 4;99(2):253-74.
2. Peron A, Bradbury K, Viskochil DH, Dias C. *BCL11A*-Related Intellectual Disability. 2019 Sep 26. In: Adam MP, Ardinger HH, Pagon RA, Wallace SE, Bean LJH, Gripp

- KW, Mirzaa GM, Amemiya A, editors. GeneReviews® [Internet]. Seattle (WA): University of Washington, Seattle; 1993–2021. PMID: 31556984.
3. Korenke GC, Schulte B, Biskup S, Neidhardt J, Owczarek-Lipska M. A Novel de novo Frameshift Mutation in the BCL11A Gene in a Patient with Intellectual Disability Syndrome and Epilepsy. *Molecular Syndromology* [Internet]. 2020 [cited 2021 Nov 16]; 11(3):135–40.
  4. Wessels MW, Cnossen MH, van Dijk TB, Gillemans N, Schmidt KLJ, van Lom K, Vinjamur DS, Coyne S, Kurita R, Nakamura Y, de Man SA, Pfundt R, Azmani Z, Brouwer RWW, Bauer DE, van den Hout MCGN, van IJcken WFJ, Philipsen S. Molecular analysis of the erythroid phenotype of a patient with BCL11A haploinsufficiency. *Blood Adv*. 2021 May 11;5(9):2339-2349.
  5. Yoshida M, Nakashima M, Okanishi T, Kanai S, Fujimoto A, Itomi K, Morimoto M, Saito H, Kato M, Matsumoto N, Chiyonobu T. Identification of novel BCL11A variants in patients with epileptic encephalopathy: Expanding the phenotypic spectrum. *Clin Genet*. 2018 Feb;93(2):368-373.
  6. Shen Y, Li R, Teichert K, Montbleau KE, Verboon JM, Voit RA, Sankaran VG. Pathogenic BCL11A variants provide insights into the mechanisms of human fetal hemoglobin silencing. *PLoS Genet*. 2021 Oct 11;17(10):e1009835.

**Tabla I.** Características clínicas de los casos publicados y de nuestro paciente

| Manifestaciones clínicas                | Frecuencia descrita por Peron et al (2019), Korenke et al (2020) y Wessels et al (2021) | Presencia en nuestro paciente |
|-----------------------------------------|-----------------------------------------------------------------------------------------|-------------------------------|
| <i>Clínica neurológica</i>              |                                                                                         |                               |
| Discapacidad intelectual                | 29/29                                                                                   | +                             |
| Retraso psicomotor                      | 29/29                                                                                   | +                             |
| Retraso del lenguaje                    | 29/29                                                                                   | +                             |
| Trastorno del comportamiento            | 9/14                                                                                    | +                             |
| Autismo                                 | 7/14                                                                                    | -                             |
| Epilepsia                               | 6/29                                                                                    | -                             |
| Alteración del sueño                    | 5/14                                                                                    | +                             |
| <i>Alteraciones hematológicas</i>       |                                                                                         |                               |
| Persistencia de HbF                     | 29/29<br>(3.1-20.8%)                                                                    | +                             |
|                                         |                                                                                         | 30.9%                         |
| <i>Alteraciones del crecimiento</i>     |                                                                                         |                               |
| Microcefalia                            | 9/14                                                                                    | +                             |
| Baja estatura                           | 5/14                                                                                    | +                             |
| <i>Alteraciones músculoesqueléticas</i> |                                                                                         |                               |
| Hiperlaxitud articular                  | 8/14                                                                                    | +                             |
| <i>Características craneofaciales</i>   |                                                                                         |                               |
| Estrabismo                              | 11/29                                                                                   | -                             |
| Epicanto                                | 5/14                                                                                    | -                             |
| Esclera azul en la infancia             | 3/14                                                                                    | -                             |
| Rostro medio plano                      | 8/14                                                                                    | -                             |
| Labio superior fino                     | 9/14                                                                                    | +                             |
| Labio inferior evertido                 | 6/14                                                                                    | +                             |
| Anomalías de pabellón auricular         | 7/14                                                                                    | +                             |

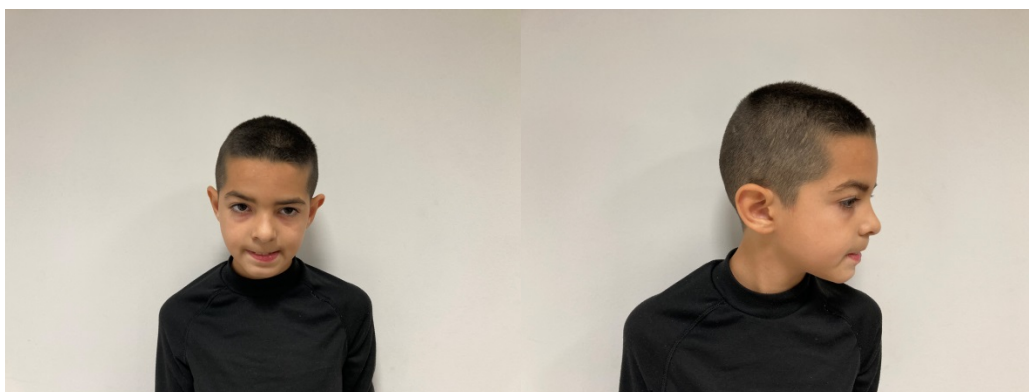

**Figura I. Fenotipo clínico a los 9 años de edad.** Estrechamiento bifrontal, surcos ciliares prominentes, ojos profundos, filtrum largo, labio superior fino, incisivos centrales prominentes, pabellones auriculares despegados de implantación en límite bajo y con ligera rotación posterior.
